# Supplementary figures and images for: Hydrogels Based on Alginates and Carboxymethyl Cellulose with Modulated Drug Release—An Experimental and Theoretical Study
Source: MDPI journal article supplement (doi:10.3390/polym13244461), 2021-12-20

F1

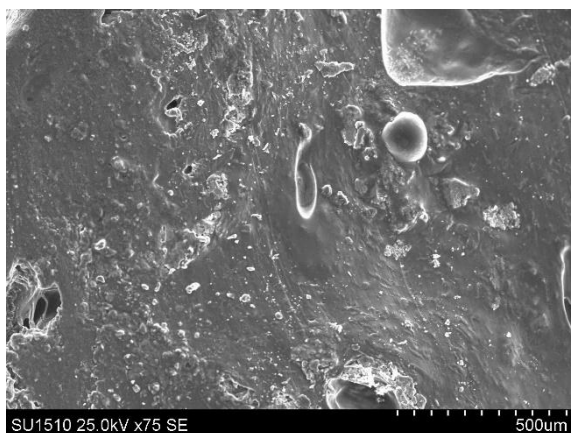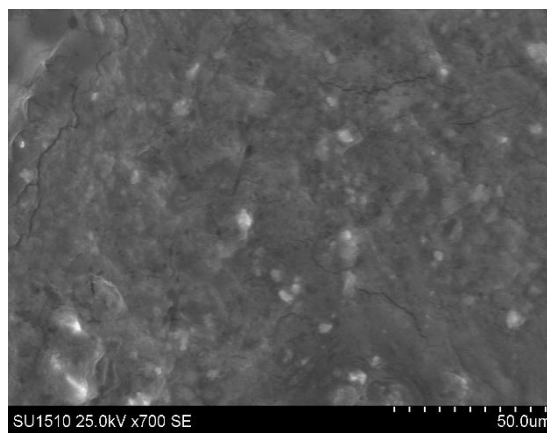

F2

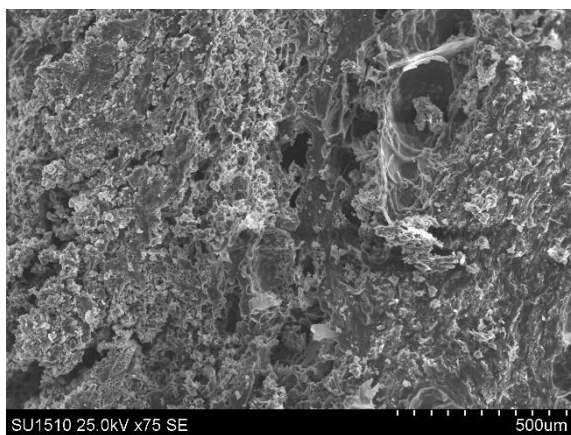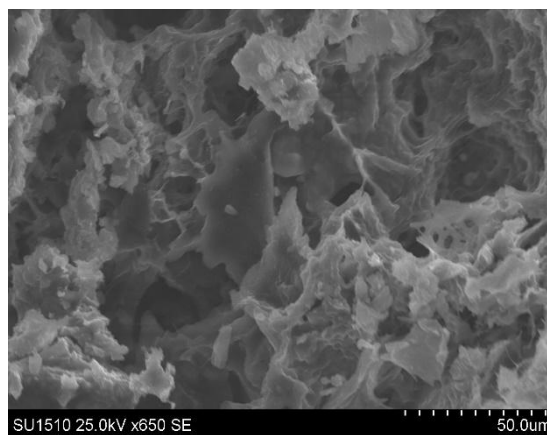

F3

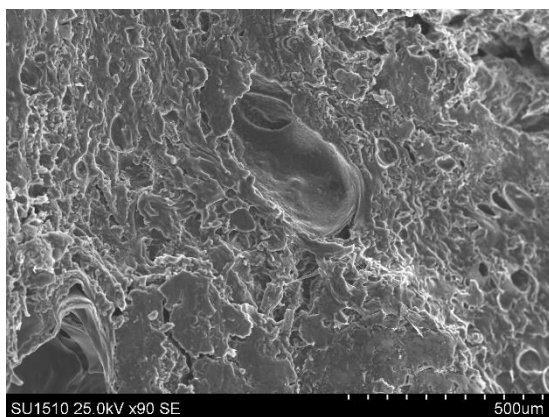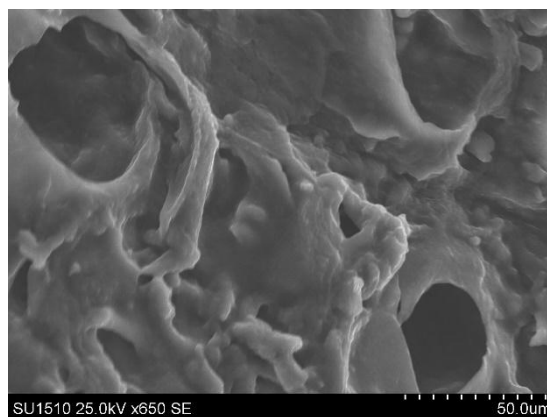

F4

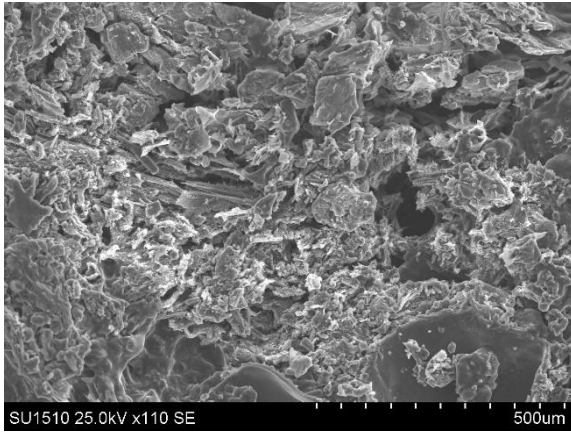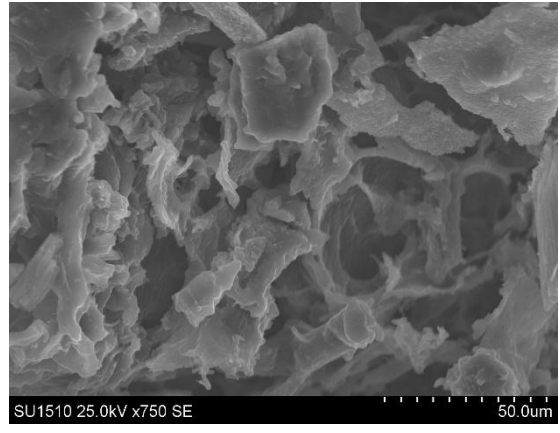

F5

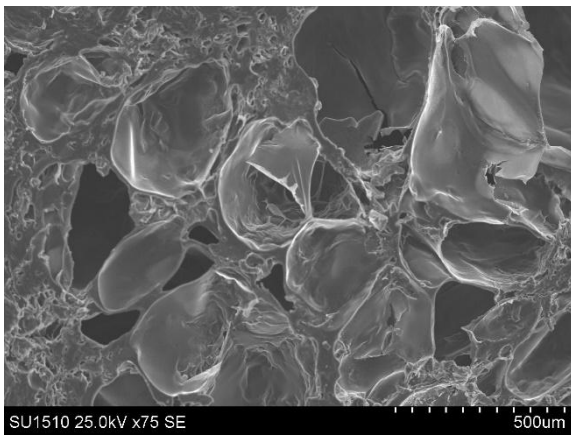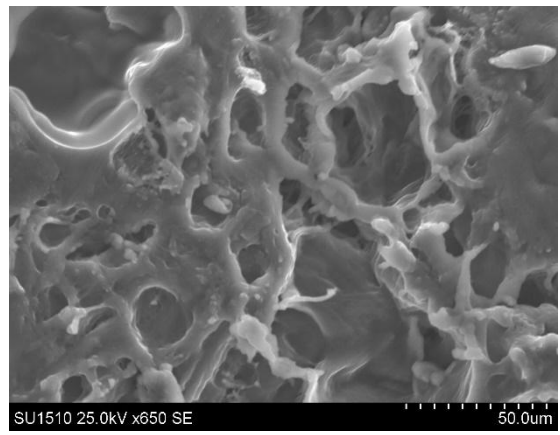

F6

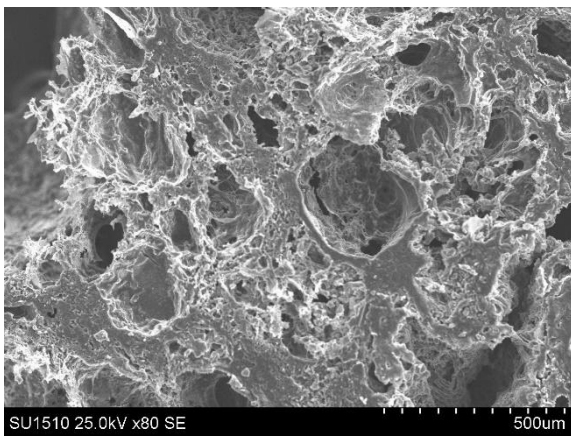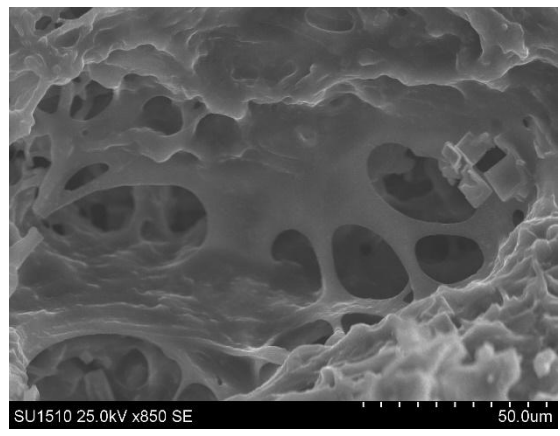

F7

Supplement: s1 [file s1]
